# Supplementary material
Source: PubMed Central journal article supplement (PMC2824033)
Supplement: NIHMS170616-supplement-01.pdf [file NIHMS170616-supplement-01.pdf]

## Supplemental Inventory

### **A higher-order complex containing AF4- and ENL-family proteins with P-TEFb facilitates oncogenic and physiologic MLL-dependent transcription**

Akihiko Yokoyama, Min Lin, Alpana Naresh, Issay Kitabayashi and Michael L. Cleary

### **Supplemental Data**

Figure S1, related to Figure 1. Supporting evidence for AEP and MLL/AEP hybrid complex compositions.

Figure S2, related to Figure 2. Supporting evidence for the co-localization of MLL fusion proteins and AEP components on chromatin.

Figure S3, related to Figure 3. Supporting evidence for preferential hetero association of AF4 and AF5q31.

Figure S4, related to Figure 5. Supporting evidence for the mutually exclusive association of ENL with DOT1L and AF5.

Figure S5, related to Figure 6. Supporting evidence for the indirect recruitment of AEP to MLL-AF6-occupied or wt MLL-occupied loci.

### **Supplemental Experimental Procedures**

Purification of the AEP complex

Antibodies used in this study (Table S1)

Primers used in this study (Tables S2 and S3)

### **Supplemental References**

## Supplemental Information

### **A higher-order complex containing AF4- and ENL-family proteins with P-TEFb facilitates oncogenic and physiologic MLL-dependent transcription**

Akihiko Yokoyama, Min Lin, Alpana Naresh, Issay Kitabayashi and Michael L. Cleary

#### **Supplemental Inventory:**

#### **Supplemental Data**

Figure S1, related to Figure 1. Supporting evidence for AEP and MLL/AEP hybrid complex compositions.

Figure S2, related to Figure 2. Supporting evidence for the co-localization of MLL fusion proteins and AEP components on chromatin.

Figure S3, related to Figure 3. Supporting evidence for preferential hetero association of AF4 and AF5q31.

Figure S4, related to Figure 5. Supporting evidence for the mutually exclusive association of ENL with DOT1L and AF5.

Figure S5, related to Figure 6. Supporting evidence for the indirect recruitment of AEP to MLL-AF6-occupied or wt MLL-occupied loci.

#### **Supplemental Experimental Procedures**

Purification of the AEP complex

Antibodies used in this study

Primers used in this study

#### **Supplemental References**

## Supplemental Data

### Supplemental Figure 1. Yokoyama et al.

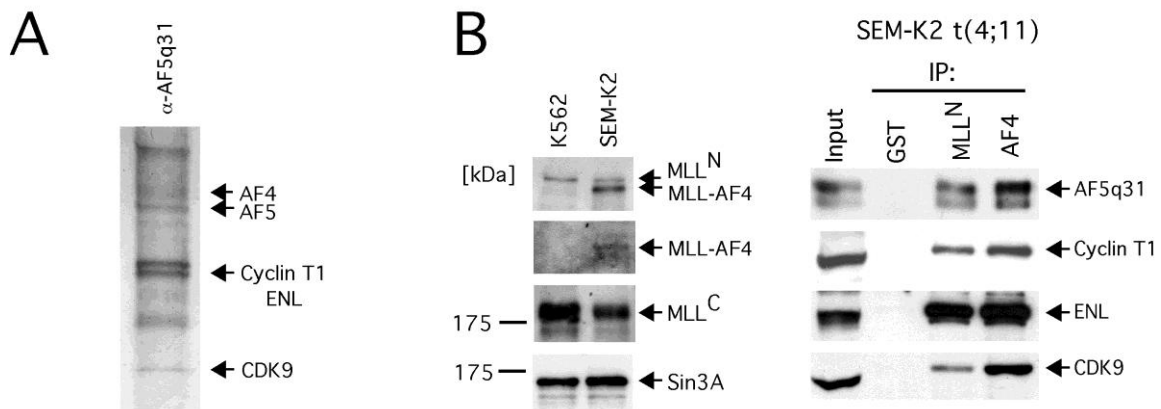

#### Figure S1, related to Figure 1. Supporting evidence for AEP and MLL/AEP hybrid complex compositions.

(A) Purification of AEP from ML-2 cells with an anti-AF5q31 antibody. A silver-stained image is shown. Mass spectrometry identified the indicated proteins.

(B) MLL-AF4 forms an AEP-like complex in SEM-K2 cells. SEM-K2 cells express MLL-AF4 visualized by anti- MLL<sup>N</sup> (top) and anti-AF4 (upper middle) antibodies. In SEM-K2 cells, anti-MLL<sup>C</sup> detected ~ 50% decreased amount of MLL<sup>C</sup> (lower middle) versus similar levels of Sin3A (bottom) compared to K562 cells. In right panel, IP was performed with the antibodies indicated at the top and precipitates immunoblotted with the antibodies indicated on the right. Anti-GST antibody served as a negative control.

## Supplemental Figure 2. Yokoyama et al.

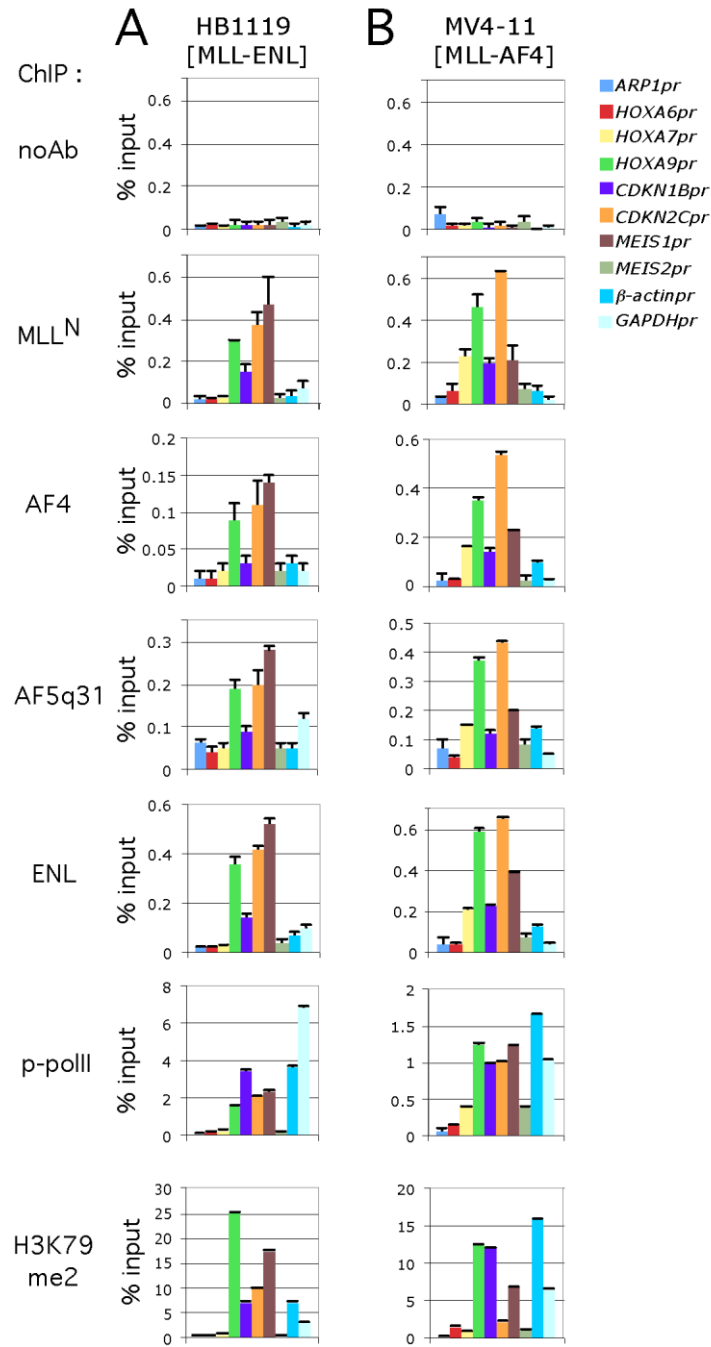

**Figure S2, related to Figure 2. Supporting evidence for the co-localization of MLL fusion proteins and AEP components on chromatin.**

(A & B) Unprocessed chromatin IP data are shown for HB1119 (A) and MV4-11 (B) cells. IP signals relative to the input are shown for the promoter adjacent regions indicated by the color key (right). Error bars represent standard deviations of triplicate PCRs.

## Supplemental Figure 3. Yokoyama et al.

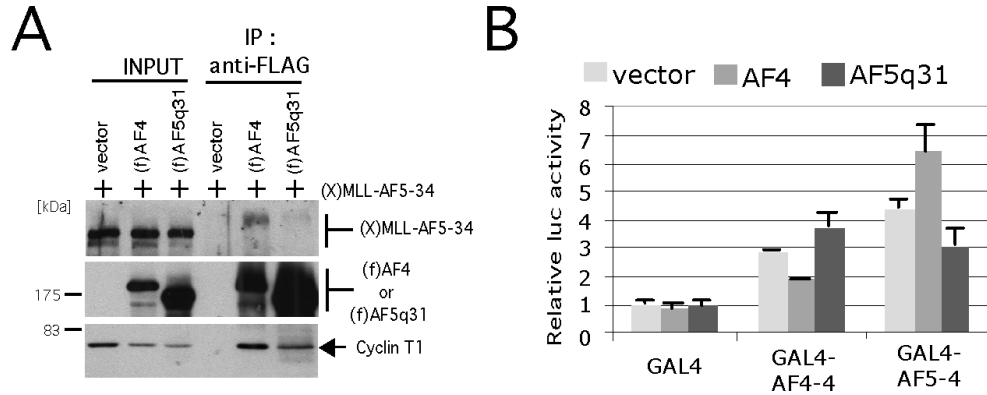

**Figure S3, related to Figure 3. Supporting evidence for preferential hetero association of AF4 and AF5q31.**

(A) Hetero-dimerization of AF4 and MLL-AF5q31 was assessed by IP western blot analysis. Xpress-tagged MLL-AF5-34 [(X)MLL-AF5-34] and FLAG-tagged AF4 or AF5q31 [(f)AF4 or (f)AF5q31] were co-expressed in 293T cells. IP was performed with anti-FLAG antibody and the precipitates were immunoblotted with anti-Xpress, anti-FLAG or anti-cyclin T1 antibodies. Co-IP of endogenous cyclin T1 served as a positive control. The mobility of MLL fusion proteins was disturbed presumably by excess amount of protein in the sample (e.g. IgG).

(B) (f)GAL4-AF4-4 and AF5-4 were tested for their transactivation activity with or without AF4(m) or AF5q31(m) co-expression. The subregion AF4-4 retains weak transactivation activity that is presumably derived from AF4 family proteins (Figure 3C). Because AF4 preferentially forms a heterodimer with AF5q31, AF4 co-expression depletes endogenous AF5q31 for GAL4-AF4-4 to associate with in order to transactivate. A similar result was obtained for GAL4-AF5-4. Error bars represent standard deviations of triplicate analyses.

**Supplemental Figure 4. Yokoyama et al.**

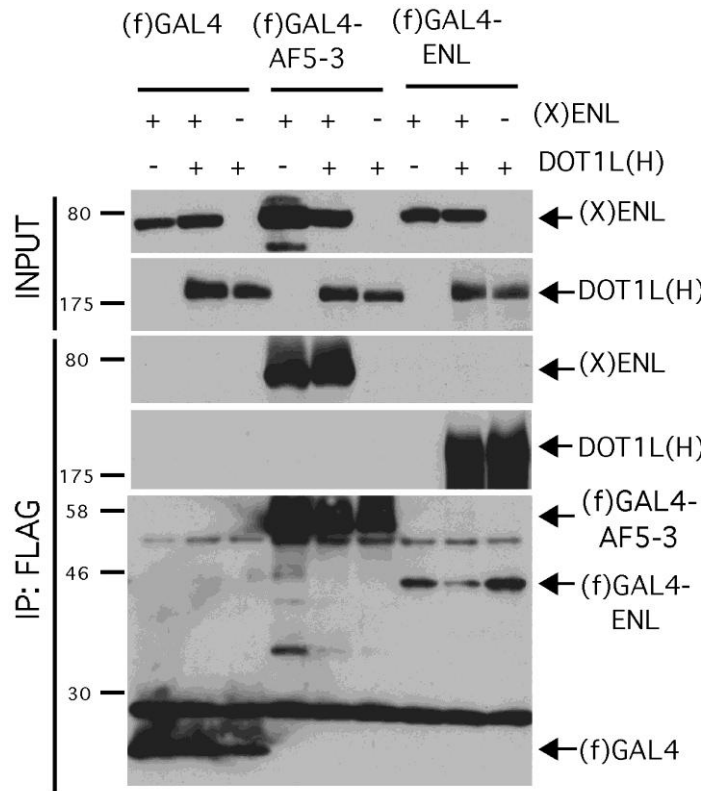

**Figure S4, related to Figure 5. Supporting evidence for the mutually exclusive association of ENL with DOT1L and AF5.**

Various GAL4 fusion proteins, (X)ENL and DOT1L(H) were expressed in 293T cells and analyzed by IP western blotting, which reveals that GAL4-AF5-3 co precipitates ENL but not DOT1L under conditions where GAL4-ENL pulls down DOT1L

## Supplemental Figure 5. Yokoyama et al.

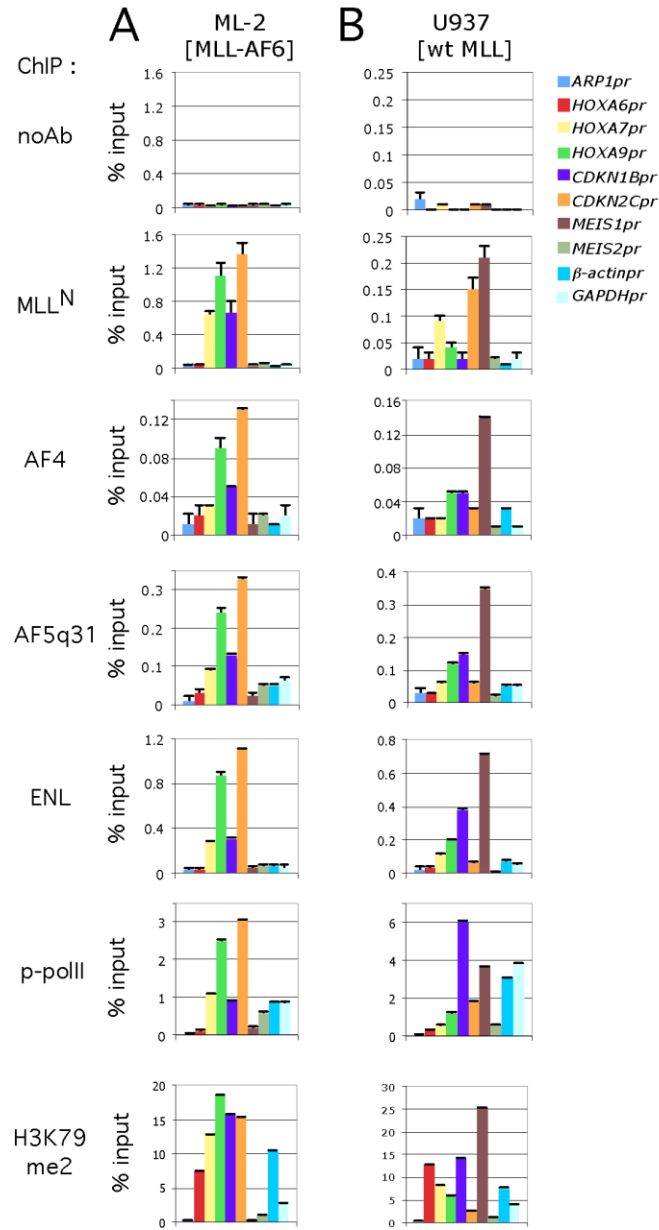

**Figure S5, related to Figure 6. Supporting evidence for the indirect recruitment of AEP to MLL-AF6-occupied or wt MLL-occupied loci.**

(A & B) Unprocessed chromatin IP data as shown for ML-2 (A) and U937 (B) cells. IP signals relative to input are shown for the promoter adjacent regions indicated by the color key (right). Error bars represent standard deviations of triplicate PCRs.

# Supplemental Experimental Procedures

## ***Purification of the AEP complex***

Nuclear extracts were prepared by a modified Dignam procedure (Dignam et al. 1983). All purification steps were carried out in buffer A (20 mM Hepes, pH 7.5, 0.5 mM EDTA, 1 mM DTT, 0.2 mM PMSF, 2 µg/ml each of leupeptin, aprotinin, and pepstatin A) supplemented with various amounts of NaCl. K562 nuclear extract containing 400 mg total protein was loaded onto a 75 ml SP sepharose column in buffer A with 150 mM NaCl. The column was washed sequentially with buffer A containing 150 mM (SP150), 250 mM (SP250), 400 mM (SP400), and 1M (SP1M) NaCl. AF4 protein eluted exclusively in the SP400 fraction, which was diluted with buffer A to reduce NaCl concentration to 200 mM before being loaded onto a 5 ml HiTrap heparin column (Amersham). The heparin column was washed sequentially with buffer A containing 200 mM (Hep200), 500 mM (Hep500), 600 mM (Hep600), and 1M (Hep1M) NaCl. For size fractionation, 5 ml of K562 nuclear extract was loaded onto an XK16/70 (Amersham) superose 6 column and eluted with buffer A containing 300 mM NaCl in 5 ml fractions. Monoclonal antibodies were crosslinked to protein G-sepharose beads (Amersham) at 2 mg/ml. The Hep600 fraction, which exclusively contained AF4 and AF5q31 proteins, was diluted with buffer A to reduce NaCl concentration to 400 mM. The fraction was then divided into 2 equal aliquots, each of which was mixed with 200 µl of anti-GST-protein G or anti-AF4 (or anti-AF5q31)-protein G beads, respectively. Complex binding was carried out at 4°C for 4 hours on a rotation wheel. The beads were then washed extensively with buffer A containing 400 mM NaCl and 0.1% NP-40. Bound proteins were eluted with 100 mM glycine (pH 3.0), resolved on 4-15% gradient SDS-PAGE (Bio-Rad), and visualized by Coomassie blue staining. Bands were excised for mass spectrometry analysis and protein identification performed by the Vincent Coates Foundation Mass Spectrometry Laboratory at Stanford University.



## ***Antibodies used in this study***

| <b>Antibodies used for IP western blotting or ChIP.</b> |                      |           |                                |
|---------------------------------------------------------|----------------------|-----------|--------------------------------|
| <b>Antigen</b>                                          | <b>Antibody type</b> | <b>ID</b> | <b>Source/reference</b>        |
| MLL <sup>N</sup>                                        | Mouse monoclonal     | mmN4.4    | Yokoyama et al., 2002          |
| MLL <sup>N</sup>                                        | Rabbit polyclonal    | rpN1      | Yokoyama et al., 2002          |
| AF4                                                     | Mouse monoclonal     | C2-1      | This study                     |
| AF5q31                                                  | Mouse monoclonal     | 1.3       | This study                     |
| ENL                                                     | Mouse monoclonal     | 3.1       | This study                     |
| Menin                                                   | Goat polyclonal      | C19       | Santa Cruz Biotechnology, Inc. |
| Menin                                                   | Rabbit polyclonal    | BL342     | Bethyl Laboratories, Inc.      |
| Cyclin T1                                               | Goat polyclonal      | T-18      | Santa Cruz Biotechnology, Inc. |
| CDK9                                                    | Rabbit polyclonal    | C-20      | Santa Cruz Biotechnology, Inc. |
| RNA pol II                                              | Rabbit polyclonal    | N-20      | Santa Cruz Biotechnology, Inc. |
| GAL4                                                    | Rabbit polyclonal    | DBD       | Santa Cruz Biotechnology, Inc. |
| Xpress epitope                                          | Mouse monoclonal     | D-8       | Santa Cruz Biotechnology, Inc. |
| Myc tag                                                 | Mouse monoclonal     | 4A6       | Upstate Biotechnology, Inc.    |
| Phospho RNA pol II                                      | Mouse monoclonal     | CTD4H8    | Upstate Biotechnology, Inc.    |
| FLAG tag                                                | Rabbit polyclonal    | F-7425    | Sigma                          |
| FLAG tag                                                | Mouse monoclonal     | M2        | Sigma                          |
| Di-methyl histone H3K79                                 | Rabbit polyclonal    | ab3594    | Abcam                          |
| Tri-methyl histone H3K4                                 | Rabbit polyclonal    | ab3580    | Abcam                          |
| Acetyl histone H3K9                                     | Rabbit polyclonal    | ab4441    | Abcam                          |
| Di-methyl histone H3K9                                  | Rabbit polyclonal    | ab7312    | Abcam                          |
| Histone H3                                              | Rabbit polyclonal    | ab1791    | Abcam                          |

## Primers used in this study

| Primers used for RT-PCR. |                                                                                              |                          |
|--------------------------|----------------------------------------------------------------------------------------------|--------------------------|
| Gene                     | Probe ID/sequence                                                                            | Source                   |
| <b>Murine genes</b>      |                                                                                              |                          |
| <i>Enl</i>               | Mm00452080_m1                                                                                | Applied Biosystems, Inc. |
| <i>Gapdh</i>             | Mm99999915_g1                                                                                | Applied Biosystems, Inc. |
| <i>Hoxa9</i>             | Mm00439364_m1                                                                                | Applied Biosystems, Inc. |
| <i>Hoxc8</i>             | Mm00439369_m1                                                                                | Applied Biosystems, Inc. |
| <i>β-Actin</i>           | Mm00607939_m1                                                                                | Applied Biosystems, Inc. |
| <b>Human genes</b>       |                                                                                              |                          |
| <i>ARP1</i>              | Hs00165626_m1                                                                                | Applied Biosystems, Inc. |
| <i>HOXA6</i>             | Hs00430615_m1                                                                                | Applied Biosystems, Inc. |
| <i>HOXA7</i>             | Hs00600844_m1                                                                                | Applied Biosystems, Inc. |
| <i>HOXA9</i>             | Hs00365956_m1                                                                                | Applied Biosystems, Inc. |
| <i>CDKN1B</i>            | Hs00153277_m1                                                                                | Applied Biosystems, Inc. |
| <i>CDKN2C</i>            | Hs00176227_m1                                                                                | Applied Biosystems, Inc. |
| <i>MEIS1</i>             | Hs00180020_m1                                                                                | Applied Biosystems, Inc. |
| <i>MEIS2</i>             | Hs00542638_m1                                                                                | Applied Biosystems, Inc. |
| <i>β-ACTIN</i>           | Hs99999903_m1                                                                                | Applied Biosystems, Inc. |
| <i>GAPDH</i>             | Hs99999905_m1                                                                                | Applied Biosystems, Inc. |
| <i>AF5q31</i>            | Hs00232683_m1                                                                                | Applied Biosystems, Inc. |
| <i>MLL (exon 9-10)</i>   | Fwd: GCCCAAGTATCCCTGTAAAACAAAA<br>Rev: CCTGCATTCTCCTGCTTATTGAC<br>Probe: CAAAAGAAAAGGAAAAACC | Custom made              |

| Primers used for chromatin immunoprecipitation assays. |                            |                                |                     |
|--------------------------------------------------------|----------------------------|--------------------------------|---------------------|
| Probes                                                 | Forward Primer Seq.        | Reverse Primer Seq.            | Reporter 1 Sequence |
| hARP1pr                                                | CGGTGTCCAGCTAAGCT          | CGAACGAGCTAGGCTTGCA            | CAGCGTCCCGCCTT      |
| hACTBpr                                                | AGGGCAGTTGCTCTGAAGTC       | CTGCAGAAGGAGCTCTTGGA           | ACTGCCTGGCACTCC     |
| hGAPDHpr                                               | CCCCTCTAGGCCCTTTGC         | GCTGAGAGGCGGGAAAGTT            | ACTACCGCAGAGCCTC    |
| hMEIS1pr                                               | CGGCGTTGATTCCCAATTTATTCA   | CACACAAACGCAGGCAGTAG           | CCGCCAGCTTTATTTT    |
| hMEIS2pr                                               | GGCCGCGCCACAAG             | CACTACGAGCCCGGAGTTG            | TTGCCGCCAGCAGC      |
| hCDKN2Cpr                                              | CTCCACAACCGTCTTAATAACAACCC | GCGGGCTTGAGTCTGTGA             | CAGCTGCCCAATTC      |
| hCDKN1Bpr                                              | GTCCCGAGGGTCCCTTC          | GTGTGCCTACCTCATCTCATACG        | CAGCTGTACATTCTG     |
| hHOXA6pr                                               | AACTCGCACCCACGAATAGG       | GCAGTGACAAAGGTGGCTTT           | CCTGCCGGCCTGCACT    |
| hHOXA7pr                                               | GCCTTCCCGTCTGGAT           | ACTCTGCCCAAGTCTTCTCTCA         | CAGGCCGGACTTAGAC    |
| hHOXA9pr                                               | TGGCTGCTTTTTATGGCTTCAATT   | CCGCGTGCAGTGC                  | CCCTCACATAAAATT     |
| hHOXA6-7center                                         | GCCTATATGGCCGGGAAATCT      | GTCCAGCTCCGGTCAGG              | CCCCGCTCGGCTAC      |
| hHOXA7downstream                                       | CCAGAGCTGATTCCGGATTCCG     | CCTCGCCTGGTCTGCA               | CCCTGAACCCAGCCCC    |
| hHOXA7intron                                           | TGCCAGGGTCCATTTCAAGATG     | CCCTCATCCCCAGGACCTT            | CTCTGTCTCATTCCC     |
| hHOXA7-9center                                         | CTAGGGATCACTCACTCACTGGAT   | AGGCAATTGCTTCTTAAGGTTTC        | CACCTTGCCCTCTCTC    |
| hHOXA9intron                                           | AGTGGCGGCGTAAATCCT         | TGATCAGTCTGTGGCTTATTGAA        | CCCGCAGCCTCATC      |
| hHOXA9downstream                                       | GGATATTCCACCAAGCCCTTTTCAT  | GGCAATGCCAATAAAGAGGTGTTT       | CTGCCCGGATAAAG      |
| hMEIS1in                                               | TCTCAGCCCTCCAAATCTTG       | TTTGTGTGTGAAATTTAGCTATTAGTTTTT | CCAGGCAGTTATTTTC    |
| mhoxc8pr                                               | GTCTACTCTTTTGACCCCTTCAGT   | GTCTAGCCCACTCAAGAGATTTC        | CCAGCTGTAATCTCC     |

## Supplemental References

Dignam, J. D., Lebovitz, R. M., and Roeder, R. G. (1983). Accurate transcription initiation by RNA polymerase II in a soluble extract from isolated mammalian nuclei. *Nucleic Acids Res* 11, 1475-1489.
